# Supplementary material for: Natural organic activator quercetin for persulfate oxidative degradation of halogenated hydrocarbons
Source: Royal Society of Chemistry journal article supplement (doi:10.1039/c9ew00178f), 2019-01-01
Supplement: c9ew00178f1.pdf [file c9ew00178f1.pdf]

## Electronic Supporting Information

Natural organic activator quercetin for persulfate oxidative degradation of  
halogenated hydrocarbons

Ya-Ting Lin, Yu-Ting Chiu, Chiya Ciou, Chenju Liang\*

Department of Environmental Engineering, National Chung Hsing University 250

Kuo-kuang Road, Taichung 402, Taiwan

\*Corresponding author. Tel.: +886-4-22851252

E-mail address: [cliang@nchu.edu.tw](mailto:cliang@nchu.edu.tw)

Table S1. Physical/Chemical properties of EPA 8010 Halogenated volatile organic compound Mix

| Compound Name<br>(Formula)                                                    | Molecular Weight<br>g/mole | Melting Point<br>°C | Boiling Point<br>°C | Density<br>g/cm <sup>3</sup> | Solubility<br>mg/L | Vapor Pressure<br>mmHg | K <sub>ow</sub> | Structure |
|-------------------------------------------------------------------------------|----------------------------|---------------------|---------------------|------------------------------|--------------------|------------------------|-----------------|-----------|
| 1,1-dichloroethane<br>(C <sub>2</sub> H <sub>4</sub> Cl <sub>2</sub> )        | 98.9                       | -96.9               | 57.3                | 1.18                         | 5000               | 234                    | 1.9             |           |
| Chloroform<br>(CHCl <sub>3</sub> )                                            | 119.4                      | -63.4               | 61.2                | 1.48                         | 8000               | 100                    | 1.97            |           |
| 1,1,1-trichloroethane<br>(C <sub>2</sub> H <sub>3</sub> Cl <sub>3</sub> )     | 133.4                      | -30.0               | 74.1                | 1.34                         | 1290               | 124                    | 2.49            |           |
| Carbontetrachloride<br>(CCl <sub>4</sub> )                                    | 153.8                      | -22.6               | 76.8                | 1.59                         | 1200               | 115                    | 2.83            |           |
| 1,2-dichloroethane<br>(C <sub>2</sub> H <sub>4</sub> Cl <sub>2</sub> )        | 98.9                       | -35.7               | 83.5                | 1.25                         | 8690               | 61                     | 1.45            |           |
| Trichloroethylene<br>(C <sub>2</sub> H <sub>3</sub> Cl <sub>3</sub> )         | 131.4                      | -84.7               | 87.2                | 1.46                         | 1000               | 58                     | 2.29            |           |
| 1,2-dichloropropane<br>(C <sub>3</sub> H <sub>6</sub> Cl <sub>2</sub> )       | 112.9                      | -100.5              | 96.4                | 1.16                         | 2800               | 50                     | 2.28            |           |
| Dibromomethane<br>(CH <sub>2</sub> Br <sub>2</sub> )                          | 173.8                      | -52.3               | 97.0                | 2.49                         | 11900              | 44                     | 1.7             |           |
| 1,1,2-trichloroethane<br>(C <sub>2</sub> H <sub>3</sub> Cl <sub>3</sub> )     | 133.4                      | -36.3               | 113.8               | 1.44                         | 4400               | 23.25                  | 2.49            |           |
| Tetrachloroethylene<br>(C <sub>2</sub> Cl <sub>4</sub> )                      | 165.8                      | -22.3               | 121.3               | 1.62                         | 150                | 14                     | 2.6             |           |
| 1,1,1,2-tetrachloroethane<br>(C <sub>2</sub> H <sub>2</sub> Cl <sub>4</sub> ) | 167.8                      | -70.2               | 130.2               | 1.54                         | 1070               | 12                     | 2.93            |           |
| Bromoform<br>(CHBr <sub>3</sub> )                                             | 252.7                      | 8.69                | 149.1               | 2.88                         | 3100               | 5                      | 2.4             |           |

|                                                                                   |       |       |       |      |      |      |      |                                                                                     |
|-----------------------------------------------------------------------------------|-------|-------|-------|------|------|------|------|-------------------------------------------------------------------------------------|
| 1,1,2,2-<br>tetrachloroethane<br>(C <sub>2</sub> H <sub>2</sub> Cl <sub>4</sub> ) | 167.8 | -42.4 | 145.2 | 1.59 | 2830 | 4.62 | 2.39 |  |
| 1,2,3-<br>trichloropropane<br>(C <sub>3</sub> H <sub>5</sub> Cl <sub>3</sub> )    | 147.4 | -14.7 | 157.0 | 1.39 | 1750 | 3.69 | 2.27 |  |

References:

1. Toxic and Chemical Substances Bureau, Environmental Protection Administration Executive Yuan, Taiwan, (2019) <https://www.tcsb.gov.tw/>
2. NIST, NIST Chemical WebBook, National Institute of Standards and Technology (NIST), (2011) <https://webbook.nist.gov/chemistry/>
